# Supplementary material for: One-pot interfacial synthesis of Au nanoparticles and Au–polyaniline nanocomposites for catalytic applications
Source: Royal Society of Chemistry journal article supplement (doi:10.1039/c2ce06396d), 2012-01-01
Supplement: c2ce06396d.pdf [file c2ce06396d.pdf]

# One-pot interfacial synthesis of Au nanoparticles and Au-polyaniline nanocomposites for catalytic applications

Bin Zhang,<sup>a</sup> Botao Zhao,<sup>a</sup> Shenghui Huang,<sup>a</sup> Ruiying Zhang,<sup>a</sup> Ping Xu<sup>\*ab</sup> and Hsing-Lin Wang<sup>\*b</sup>

<sup>a</sup> Department of Chemistry, Harbin Institute of Technology, Harbin 150001, China. Fax: 86-451-86418750; Tel: 86-451-86413702; E-mail: pxu@hit.edu.cn

<sup>b</sup> Physical Chemistry and Spectroscopy, Chemistry Division, Los Alamos National Laboratory, Los Alamos, NM 87545, USA. E-mail: hwang@lanl.gov

## Experimental

**Interfacial polymerization.** In a 20 ml vial, 1 ml of aniline (98%, Aldrich) was dissolved in 5 ml of CCl<sub>4</sub> (Aldrich) as the oil phase. 5 ml of H<sub>2</sub>O were then added to the vial to form a water/ion interface. Then, the vial was placed in an ice-water bath. 15 minutes later, 5 ml of 10 mM HAuCl<sub>4</sub> (Aldrich) were added to the water phase to initiate the polymerization of aniline. After a controlled time, the water phase was transferred, and the aqueous solution (containing Au nanoparticles) and black powders (Au-PANI nanocomposites) were separated by centrifugation. The Au-PANI nanocomposites were washed with H<sub>2</sub>O for several times and dispersed in 1 ml of H<sub>2</sub>O for catalytic study. Note: As the amount of aniline used in the reaction is excessive as compared to the oxidant, HAuCl<sub>4</sub>, the conversion rate of aniline is not calculated in our experiment.

**Catalytic study.** The reduction of rhodamine B (RhB) by NaBH<sub>4</sub> was chosen as the model system for studying the catalytic properties of Au-PANI nanocomposites. In the reaction, 1 ml of freshly prepared NaBH<sub>4</sub> (0.5 M) was added to 20 ml of RhB aqueous solution (5×10<sup>-5</sup> M). Then 0.5 ml of Au-PANI nanocomposite was added to the system. Variation of the RhB concentration was monitored by recording the absorptions at 554 nm in UV-Vis spectra.

## Additional Figures:

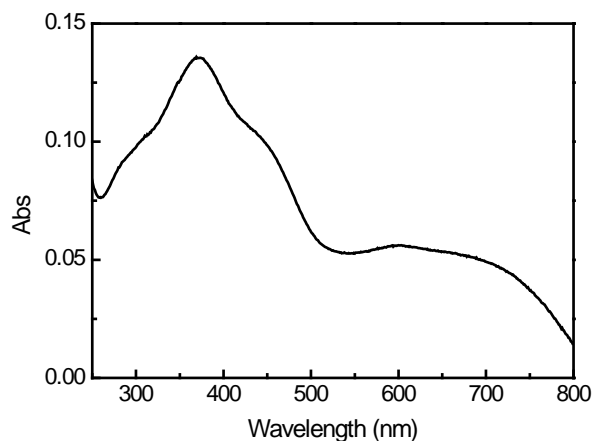

**Fig. S1** UV-Vis absorption spectrum of Au-PANI nanocomposite at a reaction time of 1 h.

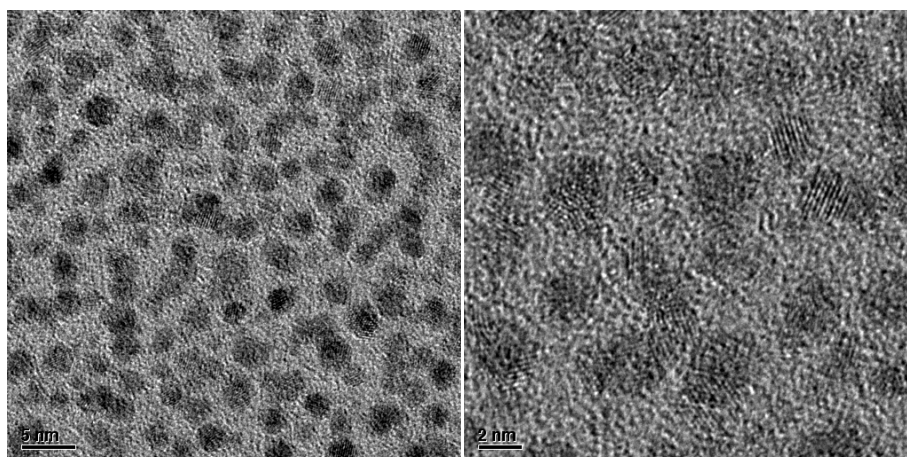

**Fig. S2** TEM images of AuNPs taken from the supernatant of the water phase, at a reaction time of 1 h.

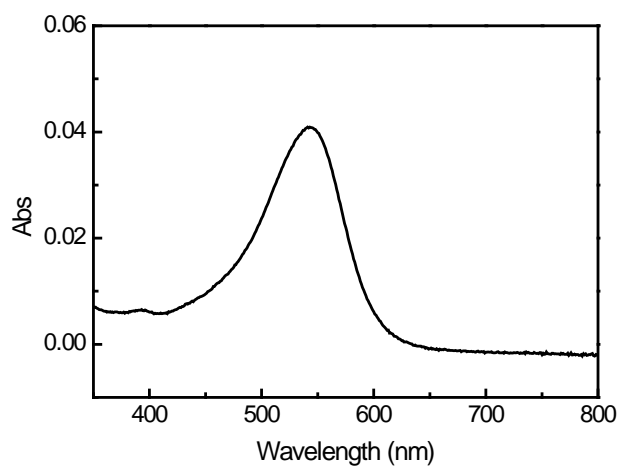

**Fig. S3** UV-Vis absorption spectrum of AuNPs at a reaction time of 12 h.

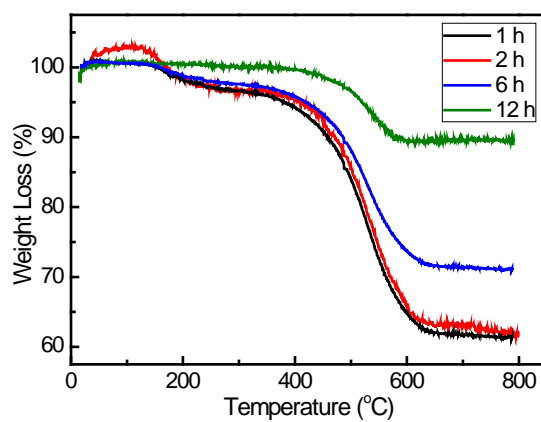

**Fig. S4** Thermogravimetric curves of Au-PANI nanocomposites.

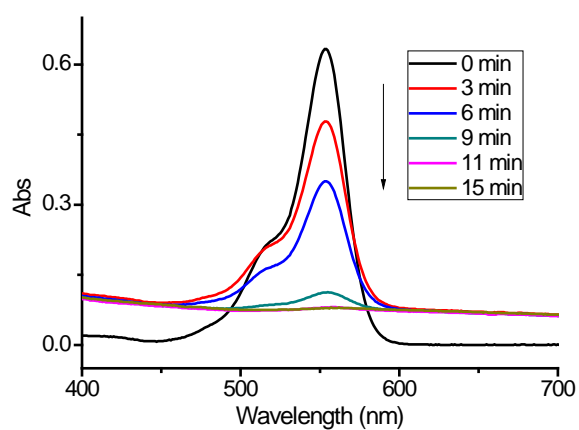

**Fig. S5** UV-Vis absorption spectrum of the reduction of RhB by NaBH<sub>4</sub> in the presence of Au-PANI nanocomposite obtained at a reaction time of 12 h.
